**Title:** High-flow nasal cannula vs non-invasive ventilation in acute hypoxia: Propensity score matched study

**Authors:** Elizabeth S Munroe, MD, MSc<sup>1</sup>, Ina Prevalaska, MD<sup>2</sup>, Madison Hyer, MS,<sup>3</sup> William J Meurer, MD, MS<sup>2</sup>, Jarrod M Mosier, MD<sup>4,5</sup>, Mark A. Tidswell, MD<sup>6</sup>, Hallie C Prescott, MD, MSc<sup>1,7</sup> Lai Wei, PhD, MS<sup>3</sup>, Henry Wang, MD, MPH, MP<sup>8</sup>, Christopher M Fung, MD MS<sup>2</sup>

- 1- Division of Pulmonary and Critical Care Medicine, Department of Medicine, University of Michigan, Ann Arbor, Michigan
- 2- Department of Emergency Medicine, University of Michigan, Ann Arbor, Michigan
- 3- Center for Biostatistics, The Ohio State University, Columbus, OH
- 4- Department of Emergency Medicine, University of Arizona College of Medicine, Tucson, Arizona
- 5- Division of Pulmonary, Allergy, Critical Care and Sleep, Department of Medicine, University of Arizona College of Medicine, Tucson, Arizona
- 6- Division of Pulmonary and Critical Care, Department of Medicine, University of Massachusetts Chan Medical School – Baystate Medical Center, Springfield, MA
- 7- VA Center for Clinical Management Research, Ann Arbor, Michigan
- 8- Department of Emergency Medicine, The Ohio State University, Columbus, OH

**Correspondence:**

Elizabeth S Munroe, MD, MSc  
6301 Medical Science Research Building III, SPC 5642  
Ann Arbor, MI 48109-5360  
Phone: (734) 763-2246  
Email: [munroeel@med.umich.edu](mailto:munroeel@med.umich.edu)

**Word counts**

Text: 3,076  
Abstract: 250  
Figures/Tables: 5  
This paper has an online supplement.

**Running title:** Comparison of non-invasive respiratory support

**Descriptor:** 4.13 Ventilation: Non-Invasive/Long-Term/Weaning

**Conflicts of Interest:** JMM has received travel support from Fisher & Paykel.

**Funding:** Author ESM was supported by Grant Number T32 HL 007749 (Multidisciplinary Training Program in Lung Disease) and Grant Number L30 HL 170379 (Loan Repayment Award) from the National Institutes of Health. This work was supported in part by a grant from NIH (NINDS and NHLBI) for infrastructure for the Clinical Coordinating Center for the Strategies to Innovate EmeRgENcy (SIREN) Care

Clinical Trials Network- 2U24NS100659. The content is solely the responsibility of the authors and does not necessarily represent the official views of the National Institutes of Health. This manuscript does not represent the views of the Department of Veterans Affairs or the US government.

**Authors' contributions:** ESM, IP, and CMF contributed to the conceptualization and design of the study, data analysis and interpretation, and drafting of this manuscript. MH, WJM, JMM, MAT, WL, HW contributed to the conceptualization of the study, data interpretation, and the writing of the manuscript, including substantive revisions. HCP contributed to data interpretation and the writing of the manuscript, including substantive revisions. All authors have read and approved the final manuscript.

**Impact:** In this propensity score matched retrospective study of patients with early acute hypoxemic respiratory failure, initial treatment with non-invasive ventilation was superior to high-flow nasal cannula for major adverse pulmonary events, calculated using a Win Ratio. These results underscore the need for novel randomized controlled trials to definitively determine the merits of each non-invasive respiratory support strategy.

## 1 **Abstract**

### 2 RATIONALE

3 The optimal treatment for early hypoxemic respiratory failure is unclear, and both high-  
4 flow nasal cannula and non-invasive ventilation are used. Determining clinically relevant  
5 outcomes for evaluating non-invasive respiratory support modalities remains a  
6 challenge.

### 8 OBJECTIVES

9 To compare the effectiveness of initial treatment with high-flow nasal cannula versus  
10 non-invasive ventilation for acute hypoxemic respiratory failure.

### 11 METHODS

12 We conducted a retrospective cohort study of patients with acute hypoxemic respiratory  
13 failure treated with high-flow nasal cannula or non-invasive ventilation within 24 hours of  
14 Emergency Department arrival (1/2018-12/2022). We matched patients 1:1 using a  
15 propensity score for odds of receiving non-invasive ventilation. The primary outcome  
16 was major adverse pulmonary events (28-day mortality, ventilator-free days, non-  
17 invasive respiratory support hours) calculated using a Win Ratio.

### 18 MEASUREMENTS AND MAIN RESULTS

19 1,265 patients met inclusion criteria. 795 (62.8%) received high-flow oxygen and 470  
20 (37.2%) received non-invasive ventilation. We propensity score matched 736/1,265  
21 (58.2%) patients. There was no difference between non-invasive ventilation vs high-flow

22 nasal cannula in 28-day mortality (17.7% vs 23.1%,  $p=0.08$ ) or ventilator-free days  
23 (median [Interquartile Range]: 28 [25, 28] vs 28 [13, 28],  $p=0.50$ ), but patients on non-  
24 invasive ventilation required treatment for fewer hours (median 7 vs 13,  $p< 0.001$ ). Win  
25 Ratio for composite major adverse pulmonary events favored non-invasive ventilation  
26 (1.26, 95%CI 1.06-1.49,  $p< 0.001$ ).

## 27 CONCLUSIONS

28 In this observational study of patients with acute hypoxemic respiratory failure, initial  
29 treatment with non-invasive ventilation was superior to high-flow nasal cannula for major  
30 pulmonary adverse events. Evaluation of composite outcomes is important in the  
31 assessment of respiratory support modalities.

32

33 Abstract word count: 250/250

34

35 Key words: acute hypoxemic respiratory failure, non-invasive ventilation, oxygen  
36 inhalation therapy

## 37 **Introduction**

38 Acute hypoxemic respiratory failure is a major cause of hospitalizations in the US.<sup>1,2</sup>  
39 There is growing evidence that non-invasive respiratory support may help prevent  
40 invasive mechanical ventilation in patients with respiratory failure.<sup>3</sup> Traditionally, the  
41 primary mode of non-invasive respiratory support was non-invasive positive pressure  
42 ventilation (NIV)—continuous positive airway pressure and bilevel positive airway  
43 pressure. Over the past decade, accelerated by the COVID-19 pandemic, high-flow  
44 nasal canula (HFNC) has emerged as an alternative.<sup>4,5</sup> NIV and HFNC work through  
45 different mechanisms and thus have different benefits and harms. NIV improves  
46 oxygenation by increasing mean airway pressure but has the potential to deliver  
47 injurious lung volumes which may put patients at risk for patient self-induced lung  
48 injury.<sup>3,6,7</sup> In contrast, HFNC provides less positive pressure ventilatory support than  
49 NIV, which may decrease the risk for self-induced lung injury and can help improve  
50 patient tolerance.<sup>7–10</sup>

51  
52 The optimal mode of non-invasive respiratory support in acute hypoxemic respiratory  
53 failure remains unclear.<sup>3,11</sup> While guidelines recommend NIV for patients with acute  
54 decompensated heart failure and chronic obstructive pulmonary disease exacerbations,  
55 these recommendations are based on comparisons of NIV to low-flow oxygen not  
56 HFNC.<sup>3,11</sup> Guidelines further conclude that there is not enough evidence to make a  
57 recommendation for HFNC vs NIV in other etiologies of hypoxemic respiratory failure.<sup>3</sup>  
58 The few trials that have directly compared HFNC to NIV have been limited by their focus  
59 on narrow populations.<sup>4,12–15</sup> The largest trial found that for intensive care unit (ICU)

60 patients with pure hypoxemic respiratory failure, HFNC decreased mortality compared  
61 to NIV.<sup>13</sup> However, trials in different populations, e.g., COVID-19 or  
62 immunocompromised patients, have yielded conflicting results.<sup>4,14,15</sup> Furthermore, the  
63 generalizability of these trials, particularly to undifferentiated hypoxemic respiratory  
64 failure in the emergency department, is limited given patients often require initiation of  
65 respiratory support before a clinical diagnosis can be made.

66

67 Additionally, many of the primary outcomes used in trials of non-invasive respiratory  
68 support, such as intubation and ventilator-free days, hinge on subjective practice  
69 decisions that limit their interpretation.<sup>16</sup> Composite outcomes can help overcome the  
70 limitations of potentially subjective individual endpoints. However, traditional  
71 approaches to generating composite outcomes lead to loss of the relative importance of  
72 key variables (e.g., mortality and need for intubation are treated similarly) and have  
73 statistical limitations that prevent the combination of different types of variables (e.g.,  
74 binary mortality and continuous ventilator-free days). The Win Ratio, which has been  
75 broadly applied in cardiology trials, offers a novel approach to composite outcomes,  
76 allowing the combination of different types of variables ranked by clinical relevance.<sup>17</sup>  
77 The goal of this study was to compare the effectiveness of initial treatment of acute  
78 hypoxemic respiratory failure with HFNC versus NIV on a composite outcome of major  
79 adverse pulmonary events, calculated using a Win Ratio.

80

## 81 **Materials and Methods**

82 *Study design and setting*

83 This is a single-center, propensity score matched, retrospective cohort study comparing  
84 initial treatment with HFNC vs NIV in patients with acute hypoxemic respiratory failure.  
85 This study was approved by the University of Michigan (UM) Institutional Review Board  
86 on 3/14/2023 (HUM00232776) as a secondary data use, exempt study.

87

#### 88 *Data Source*

89 We extracted data from the electronic health record (EPIC, Epic systems, Verona,  
90 Wisconsin) via queries to our health system's data warehouses (Clarity and Caboodle)  
91 and, for respiratory support mode data, directly from clinical flowsheets. Each variable  
92 used in our analysis, its definition and source are listed in **eTable 1**. There were no  
93 missing data for the exposure or outcome variables. Encounters with missing data on  
94 covariates in the propensity score model were excluded.

95

#### 96 *Inclusion and Exclusion Criteria*

97 We included patients  $\geq 18$  years-old presenting to the University of Michigan adult  
98 emergency department (ED) between 1/2018-12/2022 who received HFNC or NIV  
99 within 24 hours of ED arrival. To capture acute respiratory failure, we excluded patients  
100 who were on chronic home ventilator support, had a tracheostomy, or received non-  
101 invasive respiratory support only after extubation. We also excluded patients who had  
102 positive SARS-CoV-2 antigen test and clinically suspected COVID-19 infection. At our  
103 institution, HFNC was the predominant respiratory support mode used for patients with  
104 COVID-19 based on concerns about aerosolization and virus transmission with NIV. A

105 single patient may have had multiple encounters during the study period; each  
106 encounter was considered an individual observation.

107

#### 108 *Data collection and definition of respiratory support mode*

109 We identified patients who received HFNC or NIV within 24 hours of presentation to the  
110 ED based on clinical flowsheets. At our institution, respiratory therapists and nurses  
111 record respiratory support mode and settings in a flowsheet at least once per hour and  
112 whenever mode or setting changes are made. We defined HFNC as any delivery of  
113 greater than 20 liters/minute oxygen from a heated, humidified oxygen system. We  
114 defined NIV as any non-invasive ventilation mode (continuous positive airway pressure  
115 or bilevel positive airway pressure). We classified patients who received more than one  
116 non-invasive respiratory support mode during a given hour according to the dominant  
117 mode (mode used most frequently) for the hour. For the primary analysis, we classified  
118 patients as receiving initial HFNC or NIV if they received those modes exclusively for  
119 the first two hours after initiation, to ensure stable initial group assignment.

120

#### 121 *Study Outcomes*

122 The primary outcome was a hierarchical composite outcome of major adverse  
123 pulmonary events: 28-day mortality, 28-day ventilator-free days, and hours spent on  
124 non-invasive respiratory support from initiation through hour 72. The primary outcome  
125 was calculated using a Win Ratio (see *Data Analysis* below for details). We also  
126 evaluated the components of the composite major adverse pulmonary events outcome



127 individually: mortality and time to death (28-day and in-hospital), intubation rate,  
128 ventilator-free days, and non-invasive respiratory support hours.

129

### 130 *Data Analysis*

131 We used a logistic regression model to calculate a propensity score for the odds of  
132 receiving NIV using pre-specified patient characteristics typically available at the time of  
133 initiation of HFNC or NIV: age, sex, body mass index, Charlson comorbidity index,  
134 history of congestive heart failure, chronic obstructive pulmonary disease (COPD), or  
135 obstructive sleep apnea, comparison of measured pCO<sub>2</sub> by blood gas (venous or  
136 arterial) to expected pCO<sub>2</sub> by Winter's formula, time from ED arrival to HFNC or NIV  
137 initiation, initial lactate, initial Glasgow Coma Score, and highest day 1 sequential organ  
138 failure assessment (SOFA) score. While SOFA score is not available on ED arrival, it  
139 was included in the propensity score model because it provides a surrogate measure for  
140 severity of illness. ICD-10 diagnosis codes were recorded to understand etiologies of  
141 respiratory failure but were not included in the propensity score model, as discharge-  
142 level diagnoses are not available at the time of HFNC or NIV initiation.

143

144 Using the propensity score, we matched patients 1:1 utilizing greedy nearest neighbor  
145 matching with calipers set at 0.2 standard deviations.<sup>18</sup> We used standard descriptive  
146 statistics, including standard mean differences (SMD) and Kolmogorov-Smirnov  
147 statistics, to assess for covariate balance and distribution before and after propensity-  
148 score matching. SMD < 0.1 after matching was considered acceptable balance.

149

150 To calculate the primary outcome of major pulmonary adverse events, we used a Win  
151 Ratio, a statistical method for combining variables into a hierarichal composite outcome.  
152 Unlike typical composite outcomes that assign similar weight to outcomes regardless of  
153 their severity (i.e., including both all-cause mortality and need for repeat intervention) or  
154 take an “all-or-nothing” approach to evaluating the presence vs absence of an event,  
155 the Win Ratio accommodates mixed variable types (e.g., binary, ordinal, continuous,  
156 time-to-event) and ranks variables by clinical relevance and patient priorities. Prior  
157 literature has defined the calculation of the Win Ratio in detail.<sup>17</sup> In brief, we generated  
158 all possible pairs of patients on NIV and HFNC. Pairs were sequentially compared on  
159 outcomes based on pre-determined importance: 1) 28-day mortality as a survival event,  
160 2) 28-day ventilator-free days, and 3) non-invasive respiratory support hours from  
161 initiation to hour 72. We incorporated selective tie-breaking to best parallel clinical  
162 reasoning. For example, for two individuals who tied on mortality, we did not compare  
163 ventilator-free days or non-invasive respiratory support hours. Total wins and losses  
164 were added up across all three outcome tiers and compared to generate the Win Ratio,  
165 which was calculated using the WinRatio package (v1.0).<sup>19</sup>  
166  
167 Individual secondary outcomes were compared using Mann-Whitney U tests for  
168 continuous variables and Chi-squared tests for categorical variables. Time to death and  
169 time to intubation were analyzed using a Kaplan-Meier survival analysis. Hourly  
170 respiratory support mode and daily patient status were visualized using stacked  
171 histogram plots.  
172

173 We conducted several sensitivity analyses: 1) intention-to-treat framework: inclusion of  
174 patients who crossed-over between respiratory support modes or had discontinuation of  
175 non-invasive respiratory support in the first 2 hours, 2) alternative approaches to  
176 calculating the Win Ratio.

177

178 Initial data cleaning, data exploration, and visualization was performed using Tableau  
179 (Tableau Software). Final data cleaning and all statistical analyses were performed  
180 using R (v4.2.1) in R Studio (v2022.2.3).

181

## 182 **Results**

183 Between January 2018 and December 2022, 2,208/361,459 (0.6%) adult ED  
184 encounters required non-invasive respiratory support within 24 hours of ED arrival. Of  
185 these, 1,265/2,208 (57.3%) met study inclusion criteria (**Figure 1**). HFNC was the  
186 predominant mode, used in 795/1,265 (62.8%) encounters. Patients treated with NIV  
187 and HFNC had large differences in baseline congestive heart failure (78.3% vs 54.5%,  
188 SMD 0.52), pCO<sub>2</sub> above expected based on Winter's Formula (67.7% vs 33.7%, SMD  
189 0.74), shock index (heart rate/systolic blood pressure: 0.7 vs 0.8, SMD 0.36) and lactate  
190 >4 mmol/L (9.8% vs 15.0%, SMD 0.22) (**Table 1**). The most common encounter  
191 diagnosis codes were respiratory failure not otherwise specified (89.7% vs 85.5%),  
192 followed by volume overload (54.1%) and pneumonia (48.9%) in the HFNC group and  
193 volume overload (78.1%) and COPD/asthma exacerbation (52.3%) in NIV group  
194 (**eTable 2**).

195

196 In our propensity model, (**eFigure 1**) body mass index (Odds Ratio (OR) 1.03 [per kg/m<sup>2</sup>  
197 increase], 95%CI: 1.02-1.05), history of congestive heart failure (OR 2.29, 95%CI: 1.70-  
198 3.11), and pCO<sub>2</sub> above expected by Winter's formula (OR 3.49, 95%CI: 2.48-4.96)  
199 were associated with increased odds of treatment with NIV, while hemodynamic  
200 instability (shock index: OR 0.46 [per unit increase], 95%CI: 0.26-0.82) and higher  
201 SOFA (OR 0.91 [per point increase], 95%CI: 0.86-0.96) were associated with lower  
202 odds of receiving NIV.

203

204 We matched 736/1,265 (58.1%) eligible patients at a ratio of 1:1, including 368/795  
205 (45.9%) on HFNC and 368/470 (78.3%) on NIV. Patient characteristics were well-  
206 balanced between groups after matching, with all SMDs <0.1 except body mass index  
207 (SMD 0.109) (**Table 1, eFigure 2**). Matched NIV patients were similar to overall NIV  
208 patients, while matched HFNC patients had higher rates of congestive heart failure,  
209 higher body mass index, and more pCO<sub>2</sub> above expected by Winter's formula than  
210 overall HFNC patients (**Table 1**).

211

212 The primary outcome was major adverse pulmonary events. We first evaluated  
213 individual components of the major adverse pulmonary events outcome (**Table 2**).

214 There was no difference between patients treated with NIV vs HFNC in 28-day mortality  
215 (17.7% vs 23.1%, p=0.08) or ventilator-free days (median [IQR]: 28 [25,28] vs 28 [13,  
216 28], p=0.50). However, patients treated with NIV spent significantly fewer hours on non-  
217 invasive respiratory support within the first 72 hours of initiation (median 7 vs 13 hours,  
218 p<0.001). Hourly respiratory support modes up to 72 hours post-HFNC or NIV initiation

219 and daily patient status out to 28 days by treatment group are presented in the  
220 supplement (**eFigure 3 and 4**). Time to death by 28 days was also similar between  
221 patients treated with NIV vs HFNC (**eFigure 5**).

222

223 We then calculated the composite major adverse pulmonary events using the Win  
224 Ratio. There were 135,424 potential matched patient pairs (368x368). In total, NIV won  
225 in 74,008 (54.6%) pairs while HFNC won in 58,957 (43.5%), resulting in a Win Ratio for  
226 NIV of 1.26 (95% CI: 1.06-1.49,  $p=0.009$ ). NIV won over HFNC for 28-day mortality  
227 (wins, as percent of all pairs: 20.8% vs 15.8%) and NIRS hours (wins: 23.7% vs 14.7%),  
228 but not ventilator-free days (wins: 10.1% vs 13.0%). Only 2,459 (1.8%) pairs tied on all  
229 tiers (**Table 2, Figure 2**) Results were robust to sensitivity analyses including patients  
230 with early respiratory mode cross-over and discontinuation (**eTable 3**) and alternative  
231 approaches to Win Ratio calculation (**eTable 4**).

232

## 233 **Discussion**

234 In this propensity matched retrospective study of patients with acute hypoxemic  
235 respiratory failure, initial treatment with NIV decreased time spent on non-invasive  
236 respiratory support in the first 72 hours but did not have a significant impact on  
237 individual outcomes of mortality or ventilator-free days. However, treatment with NIV  
238 was associated with lower composite major adverse pulmonary events, calculated using  
239 a Win Ratio.

240

241 Our finding that initial treatment with NIV may decrease overall major adverse  
242 pulmonary events compared to HFNC contrasts with the findings of the prominent  
243 FLORALI trial. In that trial, HFNC improved mortality and ventilator-free days compared  
244 to NIV.<sup>13</sup> Unfortunately, the results of the FLORALI trial have not been replicated  
245 consistently in the few other trials that have compared HFNC and NIV in acute  
246 hypoxemic respiratory failure.<sup>3,4,14,15,20</sup> The failure to replicate these results may be due  
247 to limitations of the FLORALI trial (small sample size with potentially high fragility index)  
248 and/or due to differences in patient populations enrolled across studies. For example,  
249 while our study included all patients receiving HFNC or NIV within 24 hours of ED  
250 arrival, the FLORALI trial enrolled a much narrower population of ICU patients with pure  
251 hypoxemic respiratory failure, excluding patients with hypercarbia, cardiogenic  
252 pulmonary edema, or COPD exacerbations.<sup>13</sup> HFNC and NIV have not been directly  
253 compared in these other conditions (i.e., heart failure and COPD exacerbations), where  
254 recommendations to use NIV are based on comparisons of NIV to low-flow oxygen not  
255 HFNC.<sup>3,11</sup>  
256  
257 There has only been one trial comparing HFNC vs NIV in a broad population of  
258 patients.<sup>12</sup> Similar to our study, that trial by Doshi *et al* enrolled ED patients with acute  
259 hypoxemic respiratory failure and found HFNC was non-inferior to NIV based on  
260 intubation rates, though the trial was small and not powered to assess other outcomes.  
261 Therefore, the optimal non-invasive respiratory support mode for treating early,  
262 undifferentiated hypoxemic respiratory failure remains unclear. Our results add to  
263 clinical equipoise by suggesting that initial use of NIV may improve outcomes compared

264 to HFNC in the broader population of patients with early, undifferentiated hypoxemic  
265 respiratory failure.

266

267 Understanding the optimal initial treatment for undifferentiated hypoxemic respiratory  
268 failure is critical, particularly in the ED, where the choice between HFNC and NIV often  
269 must be made before information about a patient's diagnosis is fully available. Indeed,  
270 our findings suggest that in practice patients frequently have multiple risk factors for  
271 respiratory failure. For example, even among the patients who received HFNC, over half  
272 had a documented history of heart failure and/or COPD. While the frequency of these  
273 comorbidities may be high due to our institution's role as a tertiary referral center, this  
274 finding suggests that it may be challenging to identify patients with specific etiologies of  
275 respiratory failure in real time. This is further reflected by the mix of encounter diagnosis  
276 codes in our cohort, which suggest many patients had mixed etiologies of respiratory  
277 failure.

278

279 Our results underscore the need for a randomized controlled trial to further understand  
280 the impact of NIV vs HFNC in patients with early, undifferentiated hypoxemic respiratory  
281 failure. In order to best inform practice decisions, such trials must employ novel design  
282 approaches, such as exemption from informed consent and pragmatic designs<sup>21</sup>, to  
283 capture patients early in their disease course, ideally in the ED at the time of NIV or  
284 HFNC initiation. Future clinical trials must also select appropriate outcomes to  
285 overcome the limitations of potentially subjective primary outcomes, such as intubation  
286 or ventilator-free days.

287

288 Our study suggests that use of a Win Ratio may be a feasible approach to using  
289 composite outcomes in future studies of respiratory support modes. In our study,  
290 calculating the composite outcome of major adverse pulmonary events using a Win  
291 Ratio allowed a more nuanced understanding of the impact of NIV and HFNC on patient  
292 outcomes than individual outcomes alone. At the individual outcome level, we found no  
293 association between respiratory support mode and mortality or ventilator-free days. In  
294 contrast, based on the composite outcome of major adverse pulmonary events  
295 calculated using a Win Ratio, NIV was superior to HFNC overall and at the mortality and  
296 respiratory support hour tiers. These findings highlight one challenge of studies of  
297 respiratory failure: the limitations of single outcomes such as mortality or intubation,  
298 which can obscure other clinically important outcomes particularly when only a subset of  
299 patients experience death or intubation. For example, in our study, a majority of patients  
300 survived and were never intubated, but patients treated initially with NIV spent less total  
301 time on non-invasive respiratory support. Given both HFNC and NIV require ICU level  
302 support at many institutions, spending less time on these devices is a potentially  
303 important outcome in patients who survive and are not intubated. Additionally, decisions  
304 about intubation and extubation are often subjective<sup>16</sup>, limiting the utility of intubation  
305 and ventilator-free days as primary outcomes. The Win Ratio offers a mechanism to  
306 compare multiple relevant patient outcomes, while maintaining a hierarchical approach  
307 that reflects the relative importance of outcomes to patients and their families: first  
308 comparing mortality, then ventilator-free days, then non-invasive respiratory support



309 hours. Our results suggest that a similar Win Ratio could be used as a primary outcome  
310 for future clinical trials comparing respiratory support modalities.

311

### 312 *Limitations*

313 This study has several limitations common to retrospective studies. First, there is a risk  
314 that our findings are the result of residual confounding. The use of propensity score  
315 matching limits that risk, but the presence of confounding on unmeasured variables  
316 remains possible and a prospective clinical trial is needed to verify these findings.

317 Secondly, the assignment of the exposure group required that patients receive HFNC or  
318 NIV exclusively for the first two hours after initiation, which may limit generalizability to  
319 patients who switch support modalities or discontinue them within the first two hours.

320 However, in sensitivity analyses where the exposure group was assigned by first  
321 modality, a similar result was observed. Finally, as a single-center study performed at a  
322 tertiary care hospital, generalizability may be limited as practice patterns regarding  
323 HFNC and NIV use may differ at other centers. While indications for HFNC and NIV  
324 selection may vary across institutions, propensity matching helps ensure that the  
325 patients included in our study were similar and might be candidates for either HFNC or  
326 NIV more broadly.

327

### 328 **Conclusion**

329 In this propensity matched retrospective study of patients with early acute hypoxemic  
330 respiratory failure, initial treatment with NIV was superior to HFNC for major adverse  
331 pulmonary events, calculated using a Win Ratio. These results underscore the need for

332 novel randomized controlled trials to definitively determine the merits of each non-  
333 invasive respiratory support strategy.

## **Acknowledgements**

This material is the result of work supported with resources and the use of facilities at the Ann Arbor VA Medical Center.

## References

1. Behrendt CE. Acute Respiratory Failure in the United States. *Chest*. 2000;118(4):1100-1105. doi:10.1378/chest.118.4.1100
2. Kempker JA, Abril MK, Chen Y, Kramer MR, Waller LA, Martin GS. The Epidemiology of Respiratory Failure in the United States 2002–2017: A Serial Cross-Sectional Study. *Crit Care Explor*. 2020;2(6):e0128. doi:10.1097/CCE.000000000000128
3. Grasselli G, Calfee CS, Camporota L, et al. ESICM guidelines on acute respiratory distress syndrome: definition, phenotyping and respiratory support strategies. *Intensive Care Med*. Published online June 16, 2023. doi:10.1007/s00134-023-07050-7
4. Nair PR, Haritha D, Behera S, et al. Comparison of High-Flow Nasal Cannula and Noninvasive Ventilation in Acute Hypoxemic Respiratory Failure Due to Severe COVID-19 Pneumonia. *Respir Care*. 2021;66(12):1824-1830. doi:10.4187/respcare.09130
5. Al Hashim AH, Al Reesi A, Al Lawati NM, et al. Comparison of Noninvasive Mechanical Ventilation With High-Flow Nasal Cannula, Face-Mask, and Helmet in Hypoxemic Respiratory Failure in Patients With COVID-19: A Randomized Controlled Trial. *Crit Care Med*. 2023; Publish Ahead of Print. doi:10.1097/CCM.0000000000005963
6. Grieco DL, Menga LS, Eleuteri D, Antonelli M. Patient self-inflicted lung injury: implications for acute hypoxemic respiratory failure and ARDS patients on non-invasive support. *Minerva Anestesiol*. 2019;85(9). doi:10.23736/S0375-9393.19.13418-9
7. Carteaux G, Parfait M, Combet M, Haudebourg AF, Tuffet S, Mekontso Dessap A. Patient-Self Inflicted Lung Injury: A Practical Review. *J Clin Med*. 2021;10(12):2738. doi:10.3390/jcm10122738
8. Sun J, Li Y, Ling B, et al. High flow nasal cannula oxygen therapy versus non-invasive ventilation for chronic obstructive pulmonary disease with acute-moderate hypercapnic respiratory failure: an observational cohort study. *Int J Chron Obstruct Pulmon Dis*. 2019; Volume 14:1229-1237. doi:10.2147/COPD.S206567
9. Mauri T, Turrini C, Eronia N, et al. Physiologic Effects of High-Flow Nasal Cannula in Acute Hypoxemic Respiratory Failure. *Am J Respir Crit Care Med*. 2017;195(9):1207-1215. doi:10.1164/rccm.201605-0916OC
10. Nishimura M. High-Flow Nasal Cannula Oxygen Therapy Devices. *Respir Care*. 2019;64(6):735-742. doi:10.4187/respcare.06718

11. Rochweg B, Brochard L, Elliott MW, et al. Official ERS/ATS clinical practice guidelines: noninvasive ventilation for acute respiratory failure. *Eur Respir J*. 2017;50(2):1602426. doi:10.1183/13993003.02426-2016
12. Doshi P, Whittle JS, Bublewicz M, et al. High-Velocity Nasal Insufflation in the Treatment of Respiratory Failure: A Randomized Clinical Trial. *Ann Emerg Med*. 2018;72(1):73-83.e5. doi:10.1016/j.annemergmed.2017.12.006
13. Frat JP, Thille AW, Mercat A, et al. High-Flow Oxygen through Nasal Cannula in Acute Hypoxemic Respiratory Failure. *N Engl J Med*. 2015;372(23):2185-2196. doi:10.1056/NEJMoa1503326
14. Coudroy R, Frat JP, Ehrmann S, et al. High-flow nasal oxygen alone or alternating with non-invasive ventilation in critically ill immunocompromised patients with acute respiratory failure: a randomised controlled trial. *Lancet Respir Med*. 2022;10(7):641-649. doi:10.1016/S2213-2600(22)00096-0
15. Grieco DL, Menga LS, Cesarano M, et al. Effect of Helmet Noninvasive Ventilation vs High-Flow Nasal Oxygen on Days Free of Respiratory Support in Patients With COVID-19 and Moderate to Severe Hypoxemic Respiratory Failure: The HENIVOT Randomized Clinical Trial. *JAMA*. 2021;325(17):1731. doi:10.1001/jama.2021.4682
16. Yarnell CJ, Johnson A, Dam T, et al. Do Thresholds for Invasive Ventilation in Hypoxemic Respiratory Failure Exist? A Cohort Study. *Am J Respir Crit Care Med*. 2023;207(3):271-282. doi:10.1164/rccm.202206-1092OC
17. Redfors B, Gregson J, Crowley A, et al. The win ratio approach for composite endpoints: practical guidance based on previous experience. *Eur Heart J*. 2020;41(46):4391-4399. doi:10.1093/eurheartj/ehaa665
18. Austin PC. An Introduction to Propensity Score Methods for Reducing the Effects of Confounding in Observational Studies. *Multivar Behav Res*. 2011;46(3):399-424. doi:10.1080/00273171.2011.568786
19. Git Hub, Inc. Win Ratio Applications. Published 2023. Accessed August 15, 2023. <https://github.com/CRF-Biostatistics/WinRatioApplications>
20. Perkins GD, Ji C, Connolly BA, et al. Effect of Noninvasive Respiratory Strategies on Intubation or Mortality Among Patients With Acute Hypoxemic Respiratory Failure and COVID-19: The RECOVERY-RS Randomized Clinical Trial. *JAMA*. 2022;327(6):546. doi:10.1001/jama.2022.0028
21. Casey JD, Beskow LM, Brown J, et al. Use of pragmatic and explanatory trial designs in acute care research: lessons from COVID-19. *Lancet Respir Med*. 2022;10(7):700-714. doi:10.1016/S2213-2600(22)00044-3

**Figure 1. Study Flow Diagram**

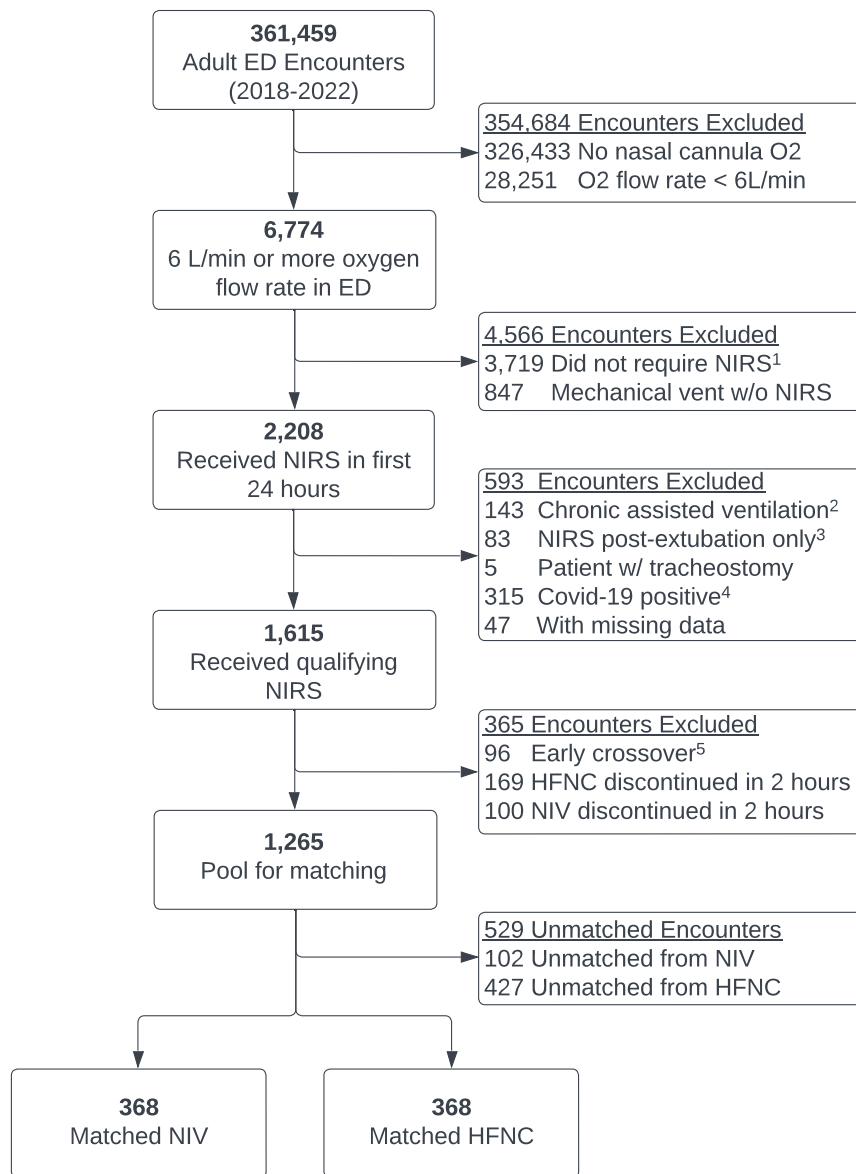

<sup>1</sup>NIRS = Non-invasive respiratory support (either HFNC or NIV)

<sup>2</sup>Chronic assisted ventilation based on vent mode, respiratory therapy documentation, or ICD-10

<sup>3</sup>Patients received NIRS after extubation within 24 hours of ED arrival

<sup>4</sup>Recent Covid-19 PCR positive and clinically considered positive

<sup>5</sup>Any crossover between HFNC and NIV within 2 hours of initiation

**Figure 1 Legend:** Study flow diagram. The primary analysis included N=1,265 patients in the pool for matching. A sensitivity analysis was performed for all patients receiving qualifying non-invasive respiratory support (NIRS), including early cross-over and discontinuation (N=1,615, see eTable 1). **Definitions:** ED= Emergency Department, O2= oxygen, L= liter, NIRS= non-invasive respiratory support, which includes both high-flow nasal cannula and non-invasive ventilation, vent= ventilation, HFNC= high-flow nasal canula, NIV= non-invasive ventilation, which includes continuous positive airway pressure and bilevel positive airway pressure.

**Figure 2.** Visualization of the Win Ratio of Major Adverse Pulmonary Events

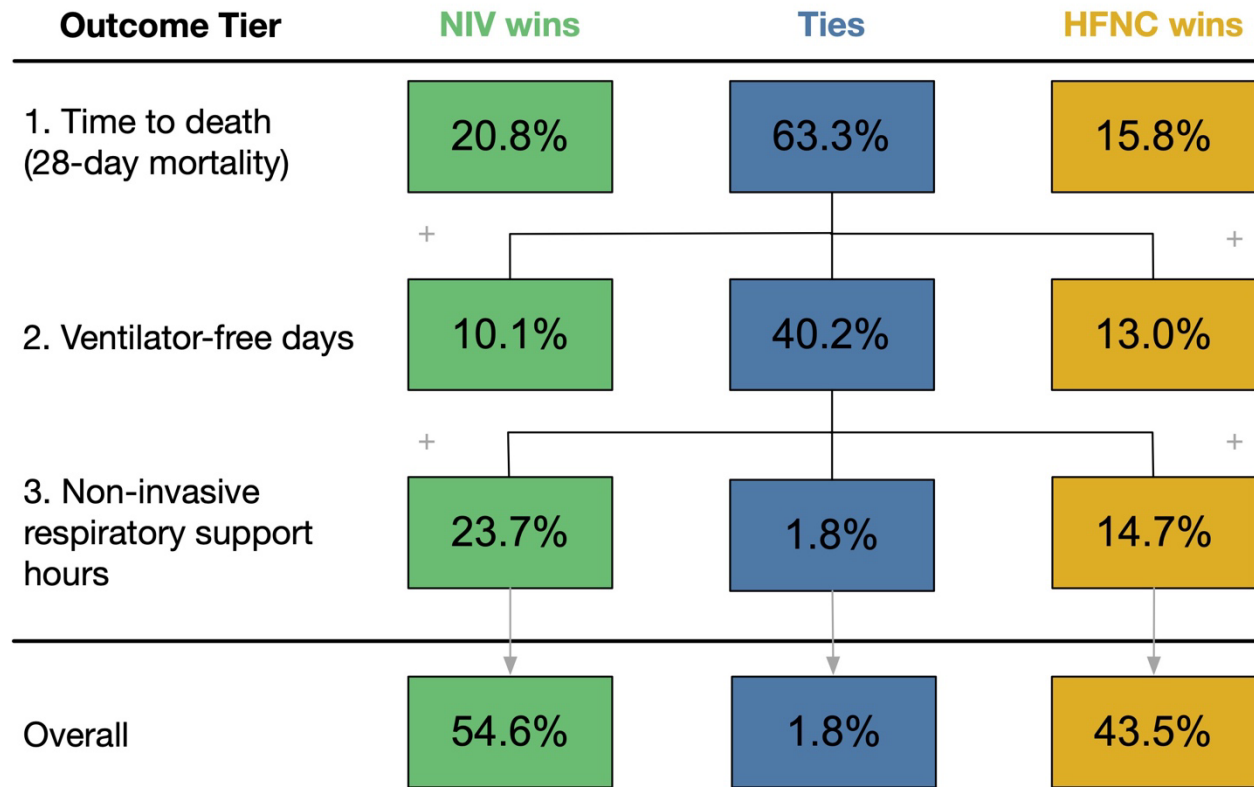

$$\text{Win ratio} = \frac{54.6\%}{43.5\%} = 1.26 \quad 95\% \text{ CI: } 1.06\text{-}1.49, p < 0.001$$

**Figure 2 Legend.** Comparison of Major Pulmonary Adverse Events between NIV and HFNC using the Win Ratio. The Win Ratio is the ratio of overall “wins for NIV” over “wins for HFNC.” A positive Win Ratio suggests NIV results in a better composite outcome compared to HFNC. Percentages represent the percent of pairs out of the total possible pairs. On tier 1 (time to death) and overall, the percentages sum to 100% because all patient pairs are compared at these levels. However, tiers 2 and 3 only compare patients who tied on the previous tier. For example, in tier 2 (ventilator-free days), the percentages add to the number of patients who tied on the previous tier (63.3%).

**Definitions:** Non-invasive respiratory support hours = time spent on non-invasive respiratory support (NIV or HFNC) in hours, from initiation through hour 72. NIV= non-invasive ventilation. HFNC= high-flow nasal cannula.

| <b>Table 1. Baseline patient characteristics before and after propensity score matching</b> |                         |                        |            |                           |                          |            |
|---------------------------------------------------------------------------------------------|-------------------------|------------------------|------------|---------------------------|--------------------------|------------|
|                                                                                             | <b>Overall Cohort</b>   |                        |            | <b>Matched Cohort</b>     |                          |            |
|                                                                                             | <b>HFNC<br/>(n=795)</b> | <b>NIV<br/>(n=470)</b> | <b>SMD</b> | <b>HFNC<br/>(n = 368)</b> | <b>NIV<br/>(n = 368)</b> | <b>SMD</b> |
| Age, year                                                                                   | 66.7 [55.4, 75.7]       | 68.9 [59.6, 77.6]      | 0.218      | 69.4 [57.1, 78.2]         | 68.3 [59.0, 77.6]        | 0.031      |
| Male sex                                                                                    | 466 (58.6)              | 245 (52.1)             | 0.131      | 194 (52.7)                | 199 (54.1)               | 0.027      |
| Body Mass Index, kg/m <sup>2</sup>                                                          | 26.3 [22.1, 31.2]       | 29.0 [23.6, 35.5]      | 0.395      | 27.4 [23.1, 32.9]         | 27.5 [23.0, 34.3]        | 0.109      |
| Charlson Comorbidity Index                                                                  | 8.0 [4.0, 14.0]         | 9.0 [5.0, 14.0]        | 0.154      | 8.0 [4.0, 14.0]           | 8.5 [5.0, 14.0]          | 0.047      |
| Individual comorbidities at baseline                                                        |                         |                        |            |                           |                          |            |
| Congestive heart failure                                                                    | 433 (54.5)              | 368 (78.3)             | 0.521      | 264 (71.7)                | 266 (72.3)               | 0.012      |
| Chronic obstructive pulmonary disease                                                       | 482 (60.6)              | 326 (69.4)             | 0.184      | 246 (66.8)                | 246 (66.8)               | <0.001     |
| Obstructive sleep apnea                                                                     | 160 (20.1)              | 132 (28.1)             | 0.187      | 86 (23.4)                 | 96 (26.1)                | 0.063      |
| Expected pCO <sub>2</sub> *                                                                 |                         |                        |            |                           |                          |            |
| pCO <sub>2</sub> at expected                                                                | 184 (23.1)              | 70 (14.9)              | 0.74       | 70 (19.0)                 | 68 (18.5)                | 0.065      |
| pCO <sub>2</sub> above expected                                                             | 268 (33.7)              | 318 (67.7)             |            | 207 (56.2)                | 218 (59.2)               |            |
| pCO <sub>2</sub> below expected                                                             | 343 (43.1)              | 82 (17.4)              |            | 91 (24.7)                 | 82 (22.3)                |            |
| First hours of non-invasive respiratory support                                             | 2.0 [1.0, 7.0]          | 2.0 [1.0, 4.8]         | 0.272      | 2.0 [1.0, 5.0]            | 2.0 [1.0, 5.0]           | 0.026      |
| Systolic shock index                                                                        | 0.8 [0.7, 1.0]          | 0.7 [0.5, 0.9]         | 0.362      | 0.7 [0.6, 0.9]            | 0.7 [0.6, 0.9]           | 0.020      |
| Lactate group, n(%)                                                                         |                         |                        |            |                           |                          |            |
| < 2 mmol/L                                                                                  | 415 (52.2)              | 293 (62.3)             | 0.22       | 210 (57.1)                | 220 (59.8)               | 0.058      |
| 2-4 mmol/L                                                                                  | 261 (32.8)              | 131 (27.9)             |            | 102 (29.6)                | 104 (28.3)               |            |
| >4 mmol/L                                                                                   | 119 (15.0)              | 46 (9.8)               |            | 49 (13.3)                 | 44 (12.0)                |            |
| Glasgow Coma Score                                                                          | 15 [15, 15]             | 15 [15, 15]            | 0.106      | 15 [15, 15]               | 15 [15, 15]              | 0.095      |
| Highest Day 1 SOFA                                                                          | 5.0 [4.0, 7.0]          | 5.0 [3.0, 6.0]         | 0.275      | 5.0 [4.0, 6.0]            | 5.0 [4.0, 7.0]           | 0.016      |

**Table 1 Legend:** Baseline characteristics in the overall cohort and matched study cohort. Data are presented as median [IQR] and N(%). \*Expected pCO<sub>2</sub> was calculated using the first available bicarbonate from a basic metabolic panel and pCO<sub>2</sub> from the first arterial or venous blood gas, comparing actual pCO<sub>2</sub> to pCO<sub>2</sub> that would be expected based on Winter's formula. pCO<sub>2</sub> above expected suggests superimposed respiratory alkalosis, while pCO<sub>2</sub> below expected suggests superimposed respiratory acidosis. Patients were matched on calculated expected pCO<sub>2</sub>, not individual pH, pCO<sub>2</sub>, or bicarbonate values.

**Definitions:** HFNC= high flow nasal cannula, NIV= non-invasive positive pressure ventilation, SMD= standard mean difference, systolic shock index= ratio of heart rate / blood pressure, SOFA= sequential organ failure assessment. Non-invasive respiratory support refers to both HFNC and NIV.



| <b>Table 2.</b> Individual outcomes for patients receiving HFNC vs NIV in the overall and matched cohort |                        |                       |                |                          |                         |                |
|----------------------------------------------------------------------------------------------------------|------------------------|-----------------------|----------------|--------------------------|-------------------------|----------------|
|                                                                                                          | <b>Overall Cohort</b>  |                       |                | <b>Matched</b>           |                         |                |
|                                                                                                          | <b>HFNC</b><br>(n=795) | <b>NIV</b><br>(n=470) | <b>p-value</b> | <b>HFNC</b><br>(n = 368) | <b>NIV</b><br>(n = 368) | <b>p-value</b> |
| 28-day mortality, n (%)                                                                                  | 215 (27.0)             | 74 (15.7)             | <0.001         | 85 (23.1)                | 65 (17.7)               | 0.082          |
| Time to death in 28-days, median days [IQR]                                                              | 6.8 [3.1, 14.2]        | 6.2 [2.7, 13.0]       | 0.539          | 7.2 [3.1, 16.2]          | 6.1 [2.7, 12.9]         | 0.280          |
| In-hospital mortality, n (%)                                                                             | 169 (21.3)             | 58 (12.3)             | <0.001         | 64 (17.4)                | 51 (13.9)               | 0.223          |
| Time to death in hospital, median days [IQR]                                                             | 5.2 [2.4, 12.5]        | 4.2 [2.2, 8.9]        | 0.415          | 5.5 [2.5, 13.6]          | 4.0 [2.2, 9.5]          | 0.406          |
| Intubation within 72 hours of HFNC or NIV initiation, n (%)                                              | 160 (20.1)             | 68 (14.5)             | 0.014          | 57 (15.5)                | 57 (15.5)               | 1.00           |
| Ventilator-free days, median [IQR]                                                                       | 28.0 [0.0, 28.0]       | 28.0 [26.0, 28.0]     | <0.001         | 28.0 [12.8, 28.0]        | 28.0 [25.0, 28.0]       | 0.497          |
| Non-invasive respiratory support hours, median [IQR]                                                     | 14.0 [6.0, 34.0]       | 8.0 [4.0, 26.3]       | <0.001         | 13.0 [6.0, 33.0]         | 7.0 [4.0, 14.0]         | <0.001         |

**Table 2 Legend.** Individual patient outcomes before and after propensity score matching. Data are presented as n(%) and median [IQR]. p-values were calculated using Mann-Whitney U for continuous variables and Chi-squared test for categorical variables. Grey rows represent outcomes that contribute to the primary composite Major Adverse Pulmonary Events outcome. Ventilator-free days were calculated from admission through day 28. Non-invasive respiratory support hours were hours spent on HFNC or NIV calculated from initiation through hour 72.

Definitions: HFNC= high flow nasal cannula, NIV= non-invasive positive pressure ventilation.

| <b>Table 3. Win Ratio of composite Major Adverse Pulmonary Events for patients receiving HFNC vs NIV</b> |                                        |                             |                    |                    |                            |                   |                   |
|----------------------------------------------------------------------------------------------------------|----------------------------------------|-----------------------------|--------------------|--------------------|----------------------------|-------------------|-------------------|
| Tier                                                                                                     | Outcome                                | Overall Cohort              |                    |                    | Matched Cohort             |                   |                   |
|                                                                                                          |                                        | NIV wins                    | HFNC wins          | Ties               | NIV wins                   | HFNC wins         | Ties              |
| 1                                                                                                        | Time to death (28-day mortality)       | 92,713<br>(24.8%)           | 51,255<br>(13.7%)  | 229,682<br>(61.5%) | 28,232<br>(20.8%)          | 21,442<br>(15.8%) | 85,750<br>(63.3%) |
| 2                                                                                                        | Ventilator-free days                   | 45,921<br>(12.3%)           | 42,225<br>(11.3%)  | 141,536<br>(37.9%) | 13,615<br>(10.0%)          | 17,589<br>(13.0%) | 54,546<br>(40.2%) |
| 3                                                                                                        | Non-invasive respiratory support hours | 87,343<br>(23.4%)           | 48,011<br>(12.8%)  | 6,182<br>(1.7%)    | 32,161<br>(23.7%)          | 19,926<br>(14.7%) | 2,459<br>(1.8%)   |
|                                                                                                          | Totals, by category                    | 225,977<br>(60.5%)          | 141,491<br>(37.9%) | 6,182<br>(1.7%)    | 74,008<br>(54.6%)          | 58,957<br>(43.5%) | 2,459<br>(1.8%)   |
|                                                                                                          | Total possible pairs                   | 373,650                     |                    |                    | 135,424                    |                   |                   |
|                                                                                                          | Win Ratio (95% CI), p-value            | 1.60 (1.39- 1.83), p <0.001 |                    |                    | 1.26 (1.06 -1.49), p=0.009 |                   |                   |

**Table 3 Legend.** Details of the Win Ratio used to calculate the composite Major Adverse Pulmonary Events in the overall cohort (N=1,265) and in the matched study cohort (N=736). The Win Ratio in the matched cohort is the primary outcome, which is also displayed visually in Figure 2.

The Win Ratio is the ratio of overall “wins for NIV” over “wins for HFNC.” A positive Win Ratio suggests NIV results in a better composite outcome compared to HFNC. Percentages represent the percent of pairs out of the total possible pairs. On tier 1 (time to death) and overall, the percentages sum to 100% because all patient pairs are compared at these levels. However, tiers 2 and 3 only compare patients who tied on the previous tier. For example, in tier 2 (ventilator-free days), the percentages add to the number of patients who tied on the previous tier.

Definitions: HFNC= high flow nasal cannula, NIV= non-invasive positive pressure ventilation. Ventilator-free days were calculated from admission through day 28. Non-invasive respiratory support hours were hours spent on HFNC or NIV calculated from initiation through hour 72.
